# Supplementary material for: Association of BIRC5 Gene Polymorphism with the Collateral Circulation and Severity of Large Artery Atherosclerotic Stroke
Source: Hindawi journal article supplement (doi:10.1155/2022/9177545), 2022-01-01

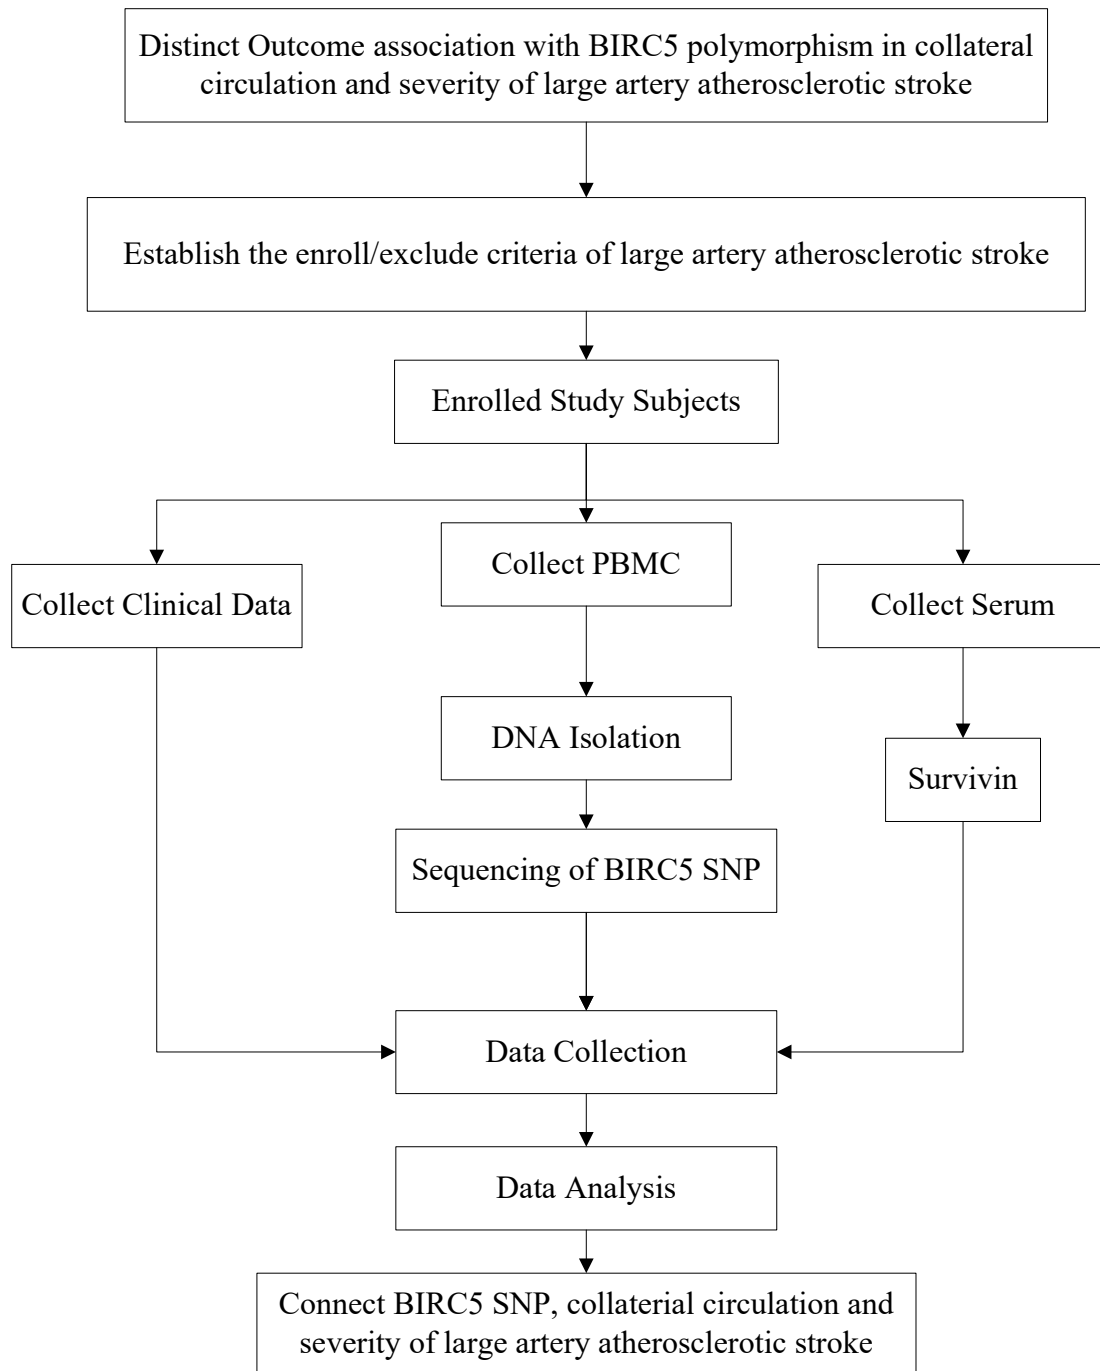

Supplement: f1 [file 9177545.f1.pdf]
